# Supplementary material for: MsAcT in siliceous monolithic microreactors enables quantitative ester synthesis in water
Source: Royal Society of Chemistry journal article supplement (doi:10.1039/c5cy02067k), 2016-01-01
Supplement: c5cy02067k1.pdf [file c5cy02067k1.pdf]

## MsACT in siliceous monolithic microreactors enables quantitative ester synthesis in water

Katarzyna Szymańska,<sup>\*a</sup> Klaudia Odrozek,<sup>a</sup> Aurelia Zniszczoł,<sup>a</sup> Guzman Torrelo,<sup>b</sup> Verena Resch,<sup>b,c</sup> Ulf Hanefeld<sup>b</sup> and Andrzej B. Jarzebski<sup>a,d</sup>

a. Department of Chemical Engineering and Process Design, Silesian University of Technology, 44-100 Gliwice, Ks. M. Strzody 7, Poland (Katarzyna.Szymanska@polsl.pl, fax: +48322371461)

b. Gebouw voor Scheikunde, Biokatalyse, Afdeling Biotechnologie, Technische Universiteit Delft, Julianalaan 136, 2628BL Delft, The Netherlands. E-mail: u.hanefeld@tudelft.nl.

c. Organische und Bioorganische Chemie, Institut für Chemie, Karl-Franzens-Universität Graz, Heinrichstrasse 28, 8010 Graz, Austria.

d. Institute of Chemical Engineering, Polish Academy of Sciences, 44-100 Gliwice, Bałtycka 5, Poland

### Table of Contents:

**Figure S1.** Cumulative pore volume distributions (A) and pore size distributions (B) obtained from mercury intrusion measurements for silica monoliths.

**Figure S2.** Nitrogen adsorption isotherms (A) and mesopore size distributions (B) for silica monoliths.

**Figure S3.** Catalytic stability of MsACT covalently immobilised on amino modified monolith.

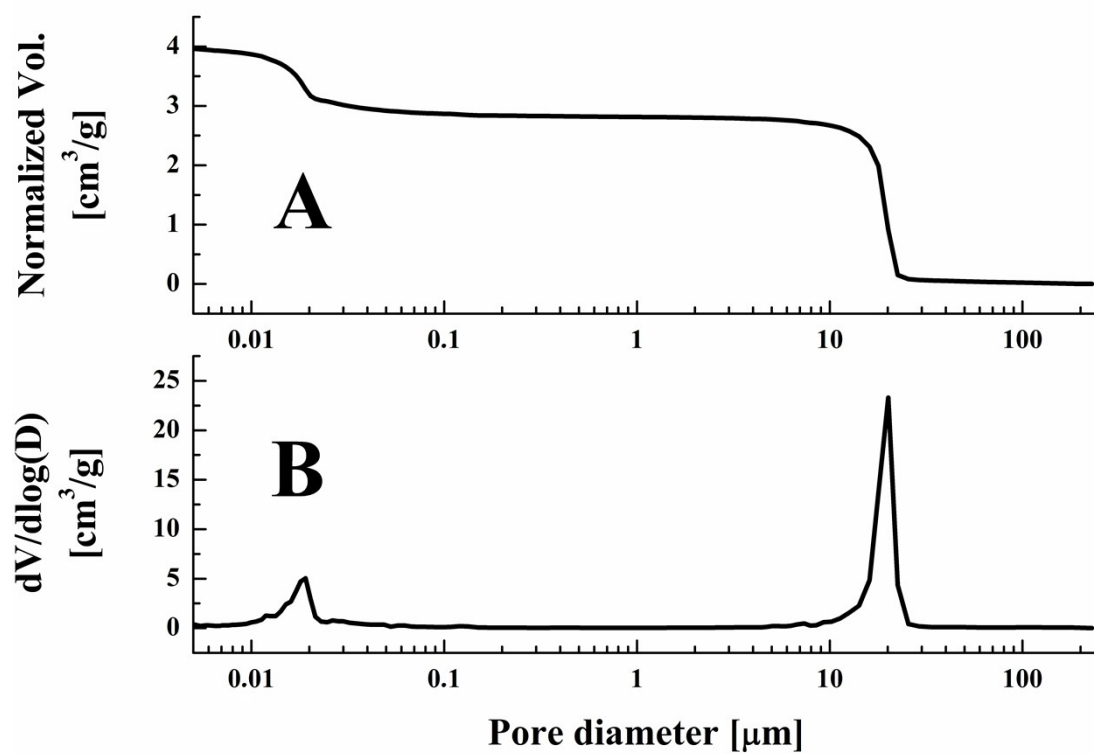

**Figure S1.** Cumulative pore volume distributions (A) and pore size distributions (B) obtained from mercury intrusion measurements for silica monoliths.

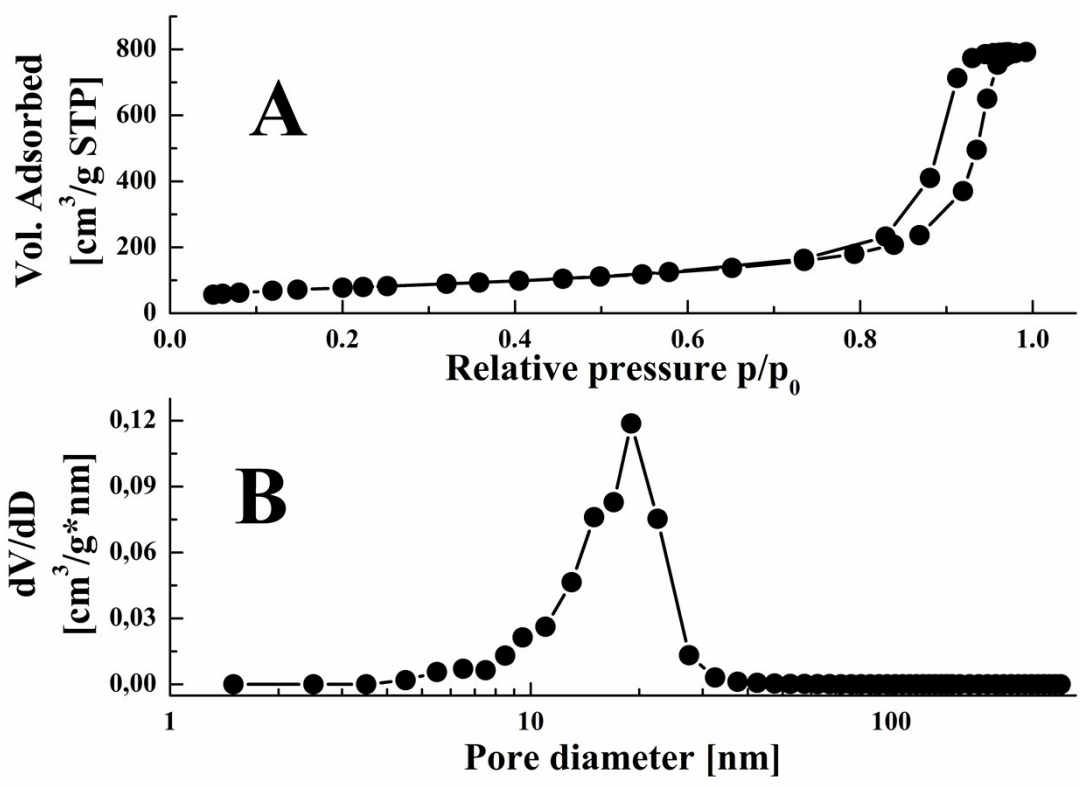

Figure S2. Nitrogen adsorption isotherms (A) and mesopore size distributions (B) for silica monoliths.

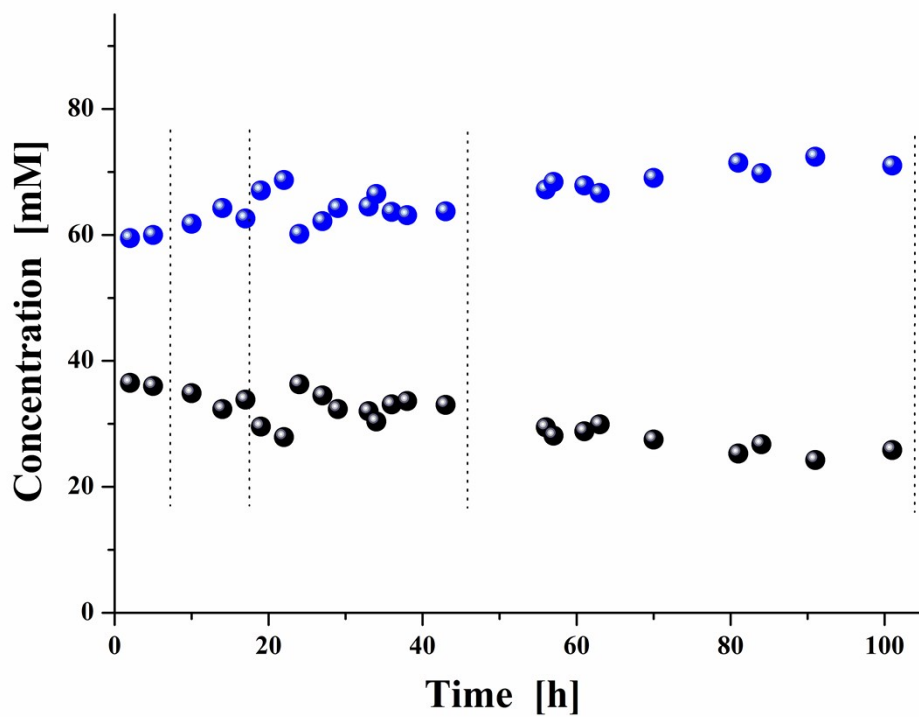

**Figure S3.** Catalytic stability of MsAcT covalently immobilised on amino modified monolith. Flow rate 0.1 mL/min (buffer/ethyl acetate 50/50 % v/v). Vertical lines show the interruptions in measurements, the immobilised enzyme was washed and stored in buffer: (black) diester, (blue) monoester.
